# Supplementary material for: Nanoliposomes protecting antimicrobial peptides via membrane-fused incorporation to fight wound infection
Source: Royal Society of Chemistry journal article supplement (doi:10.1039/d3ma00261f), 2023-01-01
Supplement: d3ma00261f1.pdf [file d3ma00261f1.pdf]

**Nanoliposome Protecting Antimicrobial Peptides by a membrane-fused incorporation  
against the infection of wound**

Hao Xue<sup>a#</sup>, Jiaying Li<sup>b#</sup>, Liwei Zhang<sup>a</sup>, Xiaolu Song<sup>a\*</sup>, Hui Shi<sup>c</sup>, Yonghai Feng<sup>a</sup>, Shuai Hou<sup>a</sup>,  
Zengkai Wang<sup>a</sup>, Taofeng Zhu<sup>b\*</sup>, Lei Liu<sup>a\*</sup>

a. Institute for Advanced Materials, Jiangsu University.

b. Department of Pulmonary and Critical Care Medicine, Yixing Hospital affiliated to Jiangsu University,  
Yixing 214200, China

c. School of Medicine, Jiangsu University.

# These authors contributed equally.

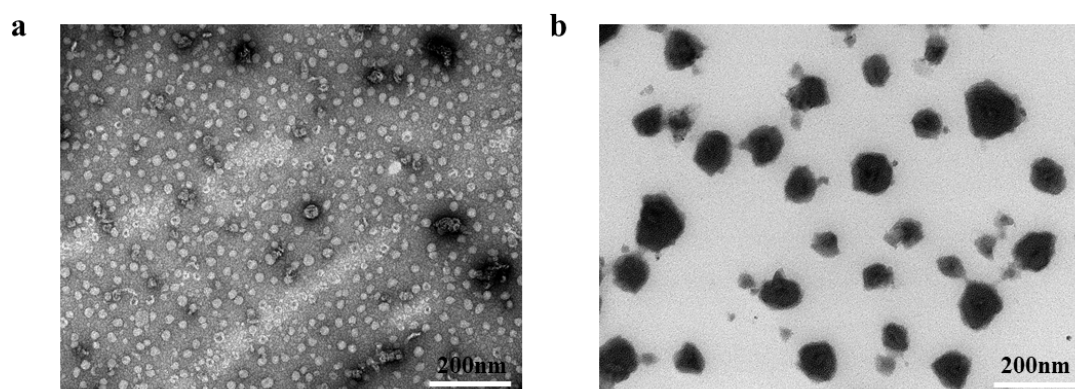

**Fig. S1** (a) Transmission electron microscopy (TEM) of liposomes and (b) TEM of FALs

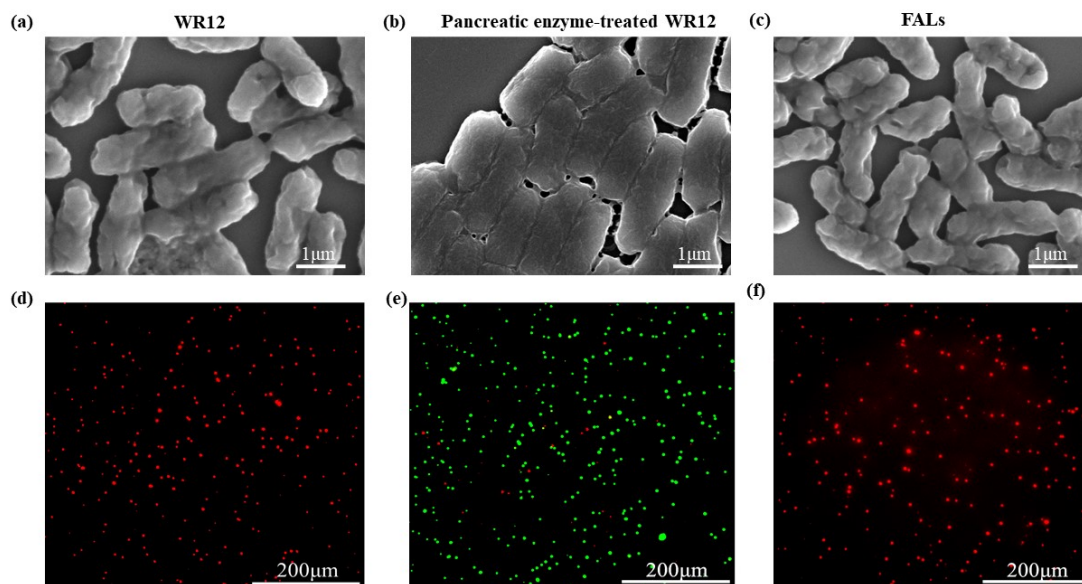

**Fig. S2** (a) The colony image of the WR12 mixed with *E. coli* for 4 h. (b) The colony image of the pancreatic enzyme-treated WR12 mixed with *E. coli* for 4 h. (c) The colony image of the FALs mixed with *E. coli* for 4 h. (d) The fluorescence image of the WR12 mixed with *E. coli* for 4 h. (e) The fluorescence image of pancreatic enzyme-treated WR12 mixed with *E. coli* for 4 h. (f) The fluorescence image of the FALs mixed with *E. coli* for 4 h.

**Table S1** Concentration and loading efficiency of FWR32 before and after ultrafiltration of FALs at four concentrations

|                                         | 1     | 2     | 3     | 4     |
|-----------------------------------------|-------|-------|-------|-------|
| Initial concentration/ $\mu\text{g/mL}$ | 24    | 25.6  | 64    | 76.8  |
| Final concentration/ $\mu\text{g/mL}$   | 14.50 | 15.50 | 42.35 | 44.08 |
| Load efficiency                         | 60.4% | 60.5% | 65.6% | 57.0% |
